# Supplementary material for: Engineered extracellular vesicles carrying let-7a-5p for alleviating inflammation in acute lung injury
Source: PubMed Central journal article supplement (PMC10949767; doi:10.1186/s12929-024-01019-4), 2024-03-19
Supplement: 12929_2024_1019_MOESM1_ESM.pdf [file 12929_2024_1019_MOESM1_ESM.pdf]

1001 **Additional files: Supplementary Information**

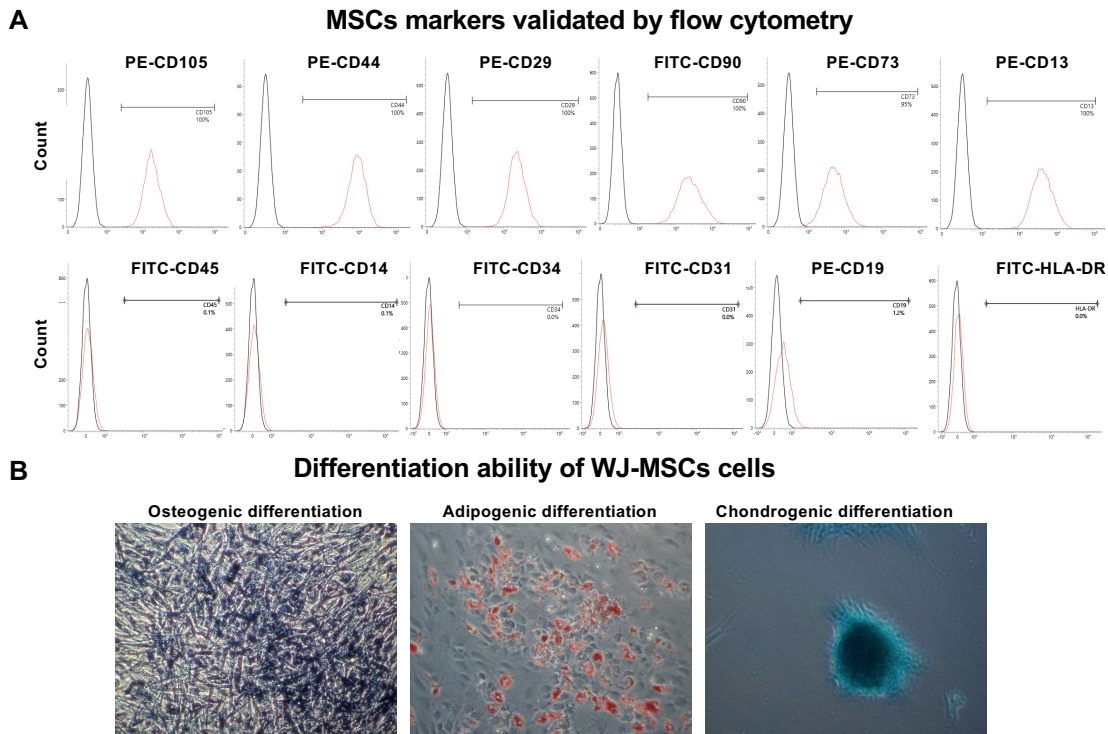

1002

1003 **Additional file 1: Figure S1. Validation of MSC surface markers and their**  
1004 **differentiation ability.**

1005 (A) Validation of MSC markers using flow cytometry, including both positive and negative  
1006 markers for MSCs. (B) Validation of the differentiation ability of WJ-MSCs through staining for  
1007 three different mesenchymal lineages.

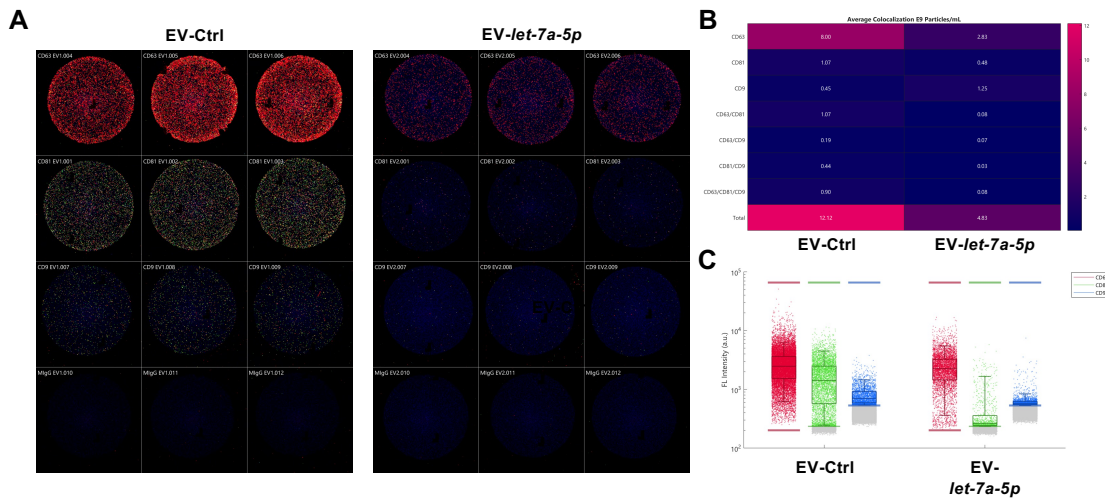

1008

1009 **Additional file 2: Figure S2. Characterization of the exosomal surface**  
 1010 **markers of EVs via ExoView.**

1011 (A) The EV signal was detected by a single particle interferometric reflectance imaging sensor  
 1012 via ExoView. (B) Colocalization analysis was performed using ExoView. We used anti-CD63 as  
 1013 a capture probe for EVs. (C) Fluorescence box plots for CD63 captured EVs.

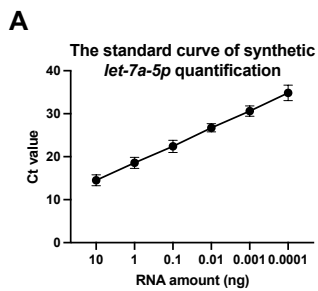

1014

1015 **Additional file 3: Figure S3. RNA content determined by qRT-PCR.**

1016 (A) The standard curve quantification of synthetic *let-7a-5p* was measured by qPCR.

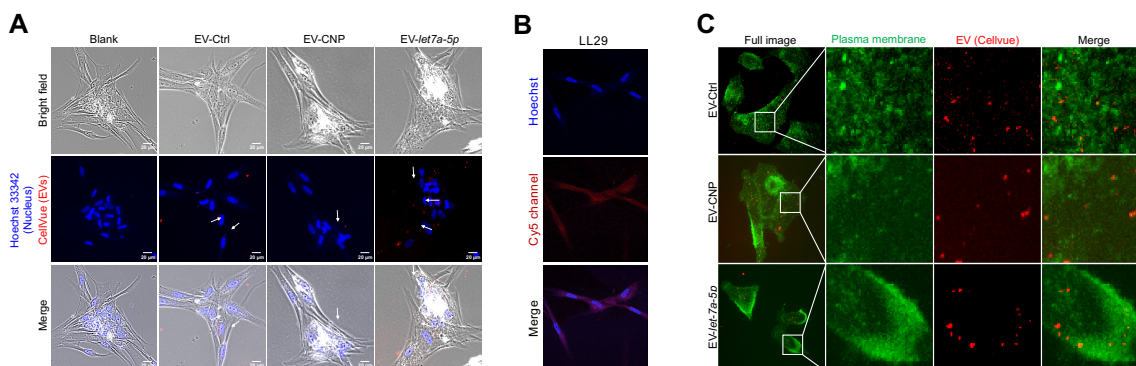

1017

1018 **Additional file 4: Figure S4. EV uptake by lung-originated cell lines.**

1019 (A) EVs were uptake by LL29 cells. The image was taken with an epi-fluorescence microscope.

1020 (B) A confocal microscope was used to evaluate the single EV uptake. However, the remarkable  
 1021 autofluorescence background was demonstrated by LL29 cells. (C) Dynamics of single-EV

1022 analysis was performed in A549 cells. The images were taken using Total Internal Reflection  
 1023 Fluorescence microscopy (TIRFM, Nikon).

1024

1025 **Additional file 5: Table S1. The total concentration, mean, and mode size of EVs**  
 1026 **from three batches**

1027 The total concentration, mean, and mode size of EVs were calculated for naive EV (EV-Ctrl), EV-  
 1028 CNP (cellular electroporation with PBS as vehicle control), and *let-7a-5p*-enriched EVs (cellular  
 1029 electroporation with *let-7a-5p* plasmid). The results are representative of n = 3 biologically  
 1030 independent experiments (3 batches). Data were presented as mean ± standard deviation.

|                     |                              | WJ-MSCs  |          |          |                        |
|---------------------|------------------------------|----------|----------|----------|------------------------|
|                     |                              | Batch 1  | Batch 2  | Batch 3  | Average                |
| <b>EV-Ctrl</b>      | Concentration (particles/mL) | 1.16E+08 | 1.38E+08 | 1.61E+08 | 1.38E+08<br>± 2.25E+07 |
|                     | Mean size (nm)               | 198.6    | 183.7    | 130.9    | 171.1<br>± 35.6        |
|                     | Mode size (nm)               | 123.5    | 140.5    | 93.7     | 119.2<br>± 23.7        |
| <b>EV-CNP</b>       | Concentration (particles/mL) | 8.50E+08 | 7.41E+08 | 8.29E+08 | 8.07E+08<br>± 5.78E+07 |
|                     | Mean size (nm)               | 105.0    | 100.6    | 101.0    | 102.2<br>± 2.4         |
|                     | Mode size (nm)               | 73.9     | 78.4     | 73.1     | 75.1<br>± 2.9          |
| <b>EV-let-7a-5p</b> | Concentration (particles/mL) | 7.01E+08 | 8.90E+08 | 1.03E+09 | 8.74E+08<br>± 1.65E+08 |
|                     | Mean size (nm)               | 116.8    | 124.0    | 144.4    | 128.4<br>± 14.3        |
|                     | Mode size (nm)               | 84.7     | 85.1     | 96.0     | 79.6<br>± 9.2          |

1031

1032 **Additional file 6: Table S2. Predicted lung fibrosis-related targets of *let-7a-5p***

1033 The listed targets were ranked based on the target scores calculated by miRDB, and this table

1034 only shows the targets related to lung fibrosis.

| Target   | Target Score | Gene Description                                                 |
|----------|--------------|------------------------------------------------------------------|
| COL3A1   | 95           | collagen type III alpha 1 chain                                  |
| COL1A2   | 92           | collagen type I alpha 2 chain                                    |
| COL4A2   | 92           | collagen type IV alpha 2 chain                                   |
| FNDC3A   | 89           | fibronectin type III domain containing 3A                        |
| COL27A1  | 88           | collagen type XXVII alpha 1 chain                                |
| COL4A1   | 88           | collagen type IV alpha 1 chain                                   |
| COL4A3BP | 87           | collagen type IV alpha 3 binding protein                         |
| COL4A6   | 87           | collagen type IV alpha 6 chain                                   |
| FNDC3B   | 81           | fibronectin type III domain containing 3B                        |
| COL5A2   | 80           | collagen type V alpha 2 chain                                    |
| LRFN4    | 79           | leucine rich repeat and fibronectin type III domain containing 4 |
| IL10     | 76           | interleukin 10                                                   |
| TAB2     | 72           | TGF-beta activated kinase 1 (MAP3K7) binding protein 2           |
| COL14A1  | 62           | collagen type XIV alpha 1 chain                                  |
| COL1A1   | 57           | collagen type I alpha 1 chain                                    |
| CTHRC1   | 54           | collagen triple helix repeat containing 1                        |
| COL9A1   | 52           | collagen type IX alpha 1 chain                                   |
| SMAD2    | 50           | SMAD family member 2                                             |

1035

1036 **Additional file 7: Table S3. Top 20 *let-7a-5p* mediated pathways analyzed via**

1037 **CPDB**

1038 A total of 990 targets were obtained from miRDB, followed by a query in CPDB for pathway

1039 analysis, highlighting pathways related to collagen synthesis.

| Rank | Pathway name                                                                      | p-value  | q-value | pathway source |
|------|-----------------------------------------------------------------------------------|----------|---------|----------------|
| 1    | Angiopoietin Like Protein 8 Regulatory Pathway                                    | 1.00E-06 | 0.0019  | Wikipathways   |
| 2    | AGE-RAGE signaling pathway in diabetic complications - Homo sapiens (human)       | 3.47E-06 | 0.0033  | KEGG           |
| 3    | Hepatitis C and Hepatocellular Carcinoma                                          | 2.42E-05 | 0.0139  | Wikipathways   |
| 4    | Scavenging by Class A Receptors                                                   | 2.91E-05 | 0.0139  | Reactome       |
| 5    | FoxO signaling pathway - Homo sapiens (human)                                     | 4.63E-05 | 0.0177  | KEGG           |
| 6    | Collagen formation                                                                | 6.52E-05 | 0.0185  | Reactome       |
| 7    | Collagen chain trimerization                                                      | 6.76E-05 | 0.0185  | Reactome       |
| 8    | Insulin Signaling                                                                 | 8.44E-05 | 0.0193  | Wikipathways   |
| 9    | EGF-Core                                                                          | 9.97E-05 | 0.0193  | Signalink      |
| 10   | Type II diabetes mellitus - Homo sapiens (human)                                  | 0.000101 | 0.0193  | KEGG           |
| 11   | Insulin-like Growth Factor-2 mRNA Binding Proteins (IGF2BPs/IMPs/VICKZs) bind RNA | 0.00014  | 0.0244  | Reactome       |
| 12   | Collagen biosynthesis and modifying enzymes                                       | 0.000154 | 0.0245  | Reactome       |
| 13   | PI3K-Akt signaling pathway                                                        | 0.000187 | 0.0248  | Wikipathways   |
| 14   | SHP2 signaling                                                                    | 0.000199 | 0.0248  | PID            |
| 15   | MAPK Signaling Pathway                                                            | 0.0002   | 0.0248  | Wikipathways   |
| 16   | Bladder cancer - Homo sapiens (human)                                             | 0.000207 | 0.0248  | KEGG           |
| 17   | Prolactin signaling pathway - Homo sapiens (human)                                | 0.000236 | 0.0266  | KEGG           |
| 18   | Transcriptional Regulation by VENTX                                               | 0.000294 | 0.0296  | Reactome       |
| 19   | O-linked glycosylation                                                            | 0.000294 | 0.0296  | Reactome       |
| 20   | MAPK signaling pathway - Homo sapiens (human)                                     | 0.000327 | 0.0303  | KEGG           |

1040
